# Supplementary material
Source: MDPI journal article supplement (https://www.mdpi.com/2073-4344/11/8/885)
Supplement: s1 [file s1]

## SUPPLEMENTARY INFORMATION

### Photocatalytic-Fenton Process under Simulated Solar Radiation Promoted by a Suitable Catalyst Selection

Aida M. Díez <sup>1,\*</sup>, Helen E. Valencia <sup>2,3</sup>, Maria Meledina <sup>2,3</sup>, Joachim Mayer <sup>2,3</sup> and Yury V. Kolen'ko <sup>1</sup>

<sup>1</sup> Nanochemistry group, International Iberian Nanotechnology group, Avda. Mestre José Veiga s/n, Braga 4715-330, Portugal; Yury.Kolenko@inl.int

<sup>2</sup> Central Facility for Electron Microscopy (GFE), RWTH Aachen University, D-52074 Aachen, Germany; valencia@gfe.rwth-aachen.de (H.E.V.); meledina@gfe.rwth-aachen.de (M.M.); j.mayer@fz-juelich.de (J.M.)

<sup>3</sup> Forschungszentrum Jülich GmbH, Ernst Ruska-Centre (ER-C), D-52425 Jülich, Germany

\* Correspondence: adiez@uvigo.es

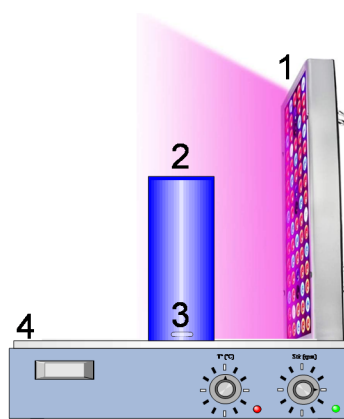

Fig. S1. Set-up schema. 1: Simulated visible lamp, 2: Cylindrical glass reactor, 3: Stirring bar, 4: Magnetic stirrer.

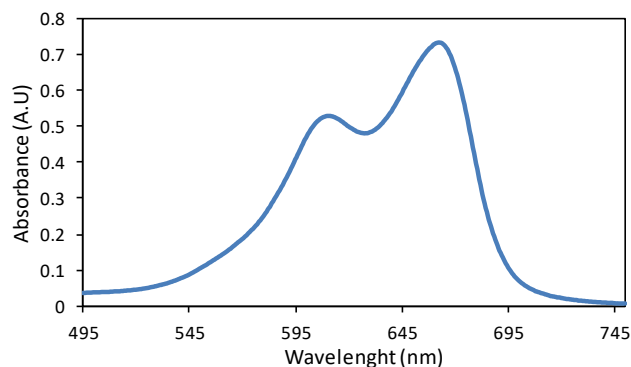

Fig. S2. Initial MB spectra attained by UV-Vis spectrophotometry.

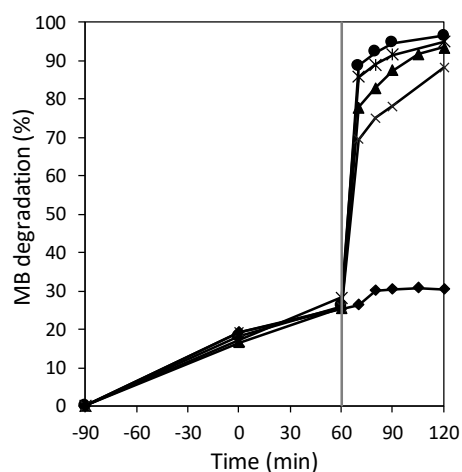

Fig. S3: MB degradation at different  $\text{H}_2\text{O}_2$  dosages: 6g/L (circles), 3g/L (asterisk), 1.5 g/L (triangles), 0.6 g/L (crosses), 0 g/L (rhombus). The vertical grey line represents the moment of the  $\text{H}_2\text{O}_2$  addition

**A**

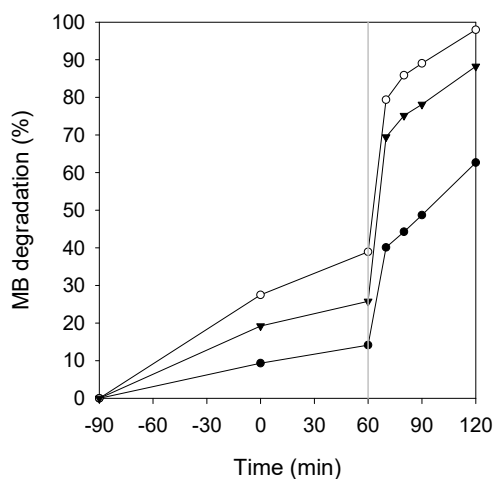

**B**

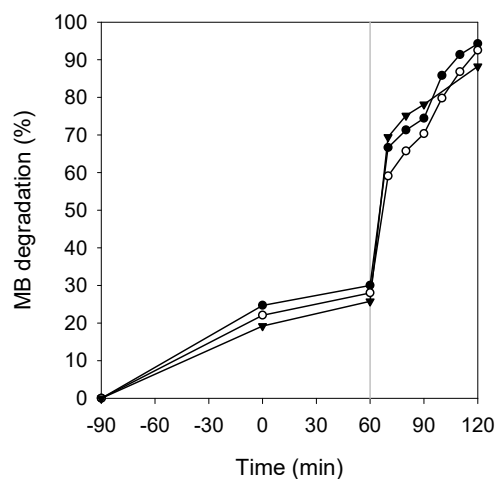

Fig. S4. A: MB degradation at MB dosage of 10 ppm (white cycles), 20 ppm (triangles) and 40 ppm (black circles) with  $\text{H}_2\text{O}_2$  0.6 g/L and 0.8 g/L catalyst dosage B: MB degradation at same concentrations when keeping the ratio  $\text{MB}/\text{H}_2\text{O}_2$  and  $\text{MB}/\text{catalyst}$  dosage at 0.025 and 33.33, respectively. The vertical grey line represents the moment of the  $\text{H}_2\text{O}_2$  addition.

Table. 1-S. Textural and structural properties of  $\text{Fe}_3\text{O}_4\text{-SiO}_2\text{-TiO}_2$ .

|                                                                 |        |
|-----------------------------------------------------------------|--------|
| <b>Surface area (<math>\text{m}^2/\text{g}</math>)</b>          | 30.992 |
| <b>External surface area (<math>\text{m}^2/\text{g}</math>)</b> | 29.127 |
| <b>Pore Volume (<math>\text{cm}^3/\text{g}</math>)</b>          | 0.240  |
| <b>Pore Diameter (nm)</b>                                       | 3.715  |
| <b>Micropore volume (<math>\text{cm}^3/\text{g}</math>)</b>     | 0.001  |
| <b>Micropore area (<math>\text{m}^2/\text{g}</math>)</b>        | 1.865  |

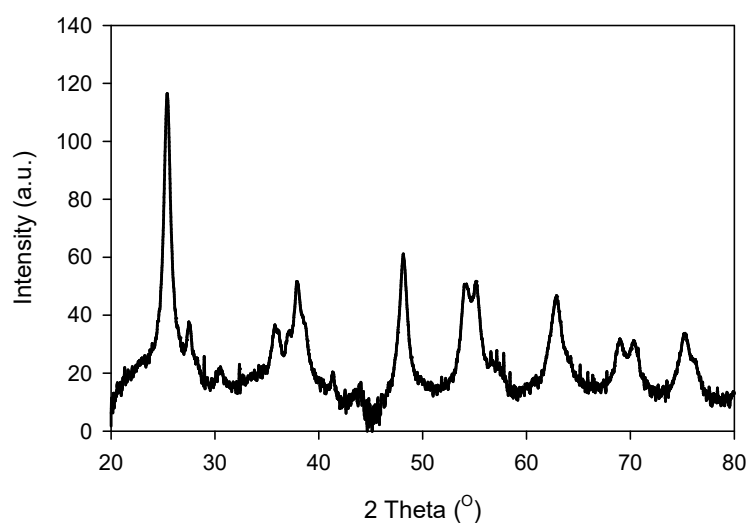

Fig. S5. XRD pattern of the synthesised  $\text{Fe}_3\text{O}_4\text{-SiO}_2\text{-TiO}_2$  catalyst.

Fig. S5 shows XRD patterns of the  $\text{Fe}_3\text{O}_4\text{-SiO}_2\text{-TiO}_2$  catalyst and the results revealed a set of different sharp peaks related to the conforming compounds, typical of a high crystalline structure. Indeed, peaks at  $38.0^\circ$ ,  $48.2^\circ$ ,  $54.6^\circ$ ,  $55.2^\circ$ ,  $63.0^\circ$ ,  $68.8^\circ$ ,  $70.5^\circ$  and  $75.5^\circ$  are related to the tetragonal structure of anatase  $\text{TiO}_2$  (Bekena & Kuo, 2020). Moreover, the small peaks at  $30.6^\circ$  and  $57.0^\circ$  as well as the peak at  $35.8^\circ$  correspond to pure  $\text{Fe}_3\text{O}_4$  (Lei et al., 2020). Moreover, the broad peak at  $63.0^\circ$  can be related not only to  $\text{TiO}_2$  but also to  $\text{Fe}_3\text{O}_4$  (Bekena & Kuo, 2020; Lei et al., 2020).  $\text{SiO}_2$  has an amorphous structure although some small peaks found at  $22\text{-}23^\circ$  have been related to its presence (Mohamed & Harraz, 2020).

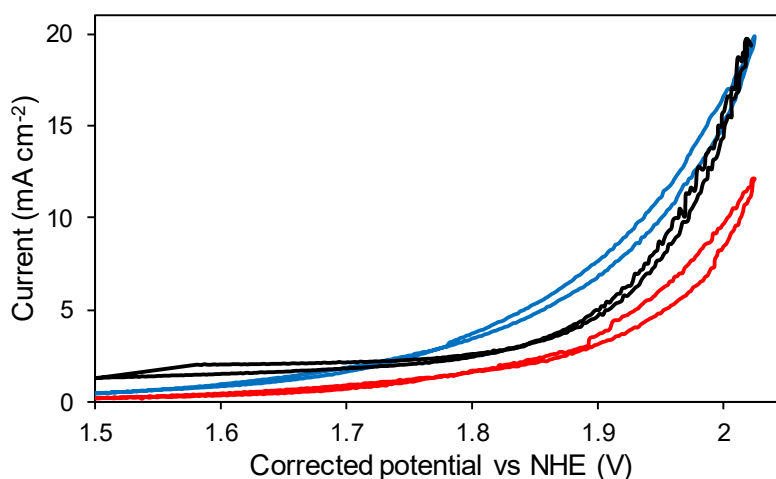

Fig. S6. Cyclic voltammetry of  $\text{TiO}_2$  (red),  $\text{Fe}_3\text{O}_4\text{-SiO}_2\text{-TiO}_2$  (blue) and  $\text{Fe}_3\text{O}_4$  (black) catalysts.
